# Supplementary material for: Transcriptome profiling of human oocytes experiencing recurrent total fertilization failure
Source: PubMed Central journal article supplement (PMC6297154; doi:10.1038/s41598-018-36275-6), 2018-12-17
Supplement: 41598_2018_36275_MOESM1_ESM.pdf [file 41598_2018_36275_MOESM1_ESM.pdf]

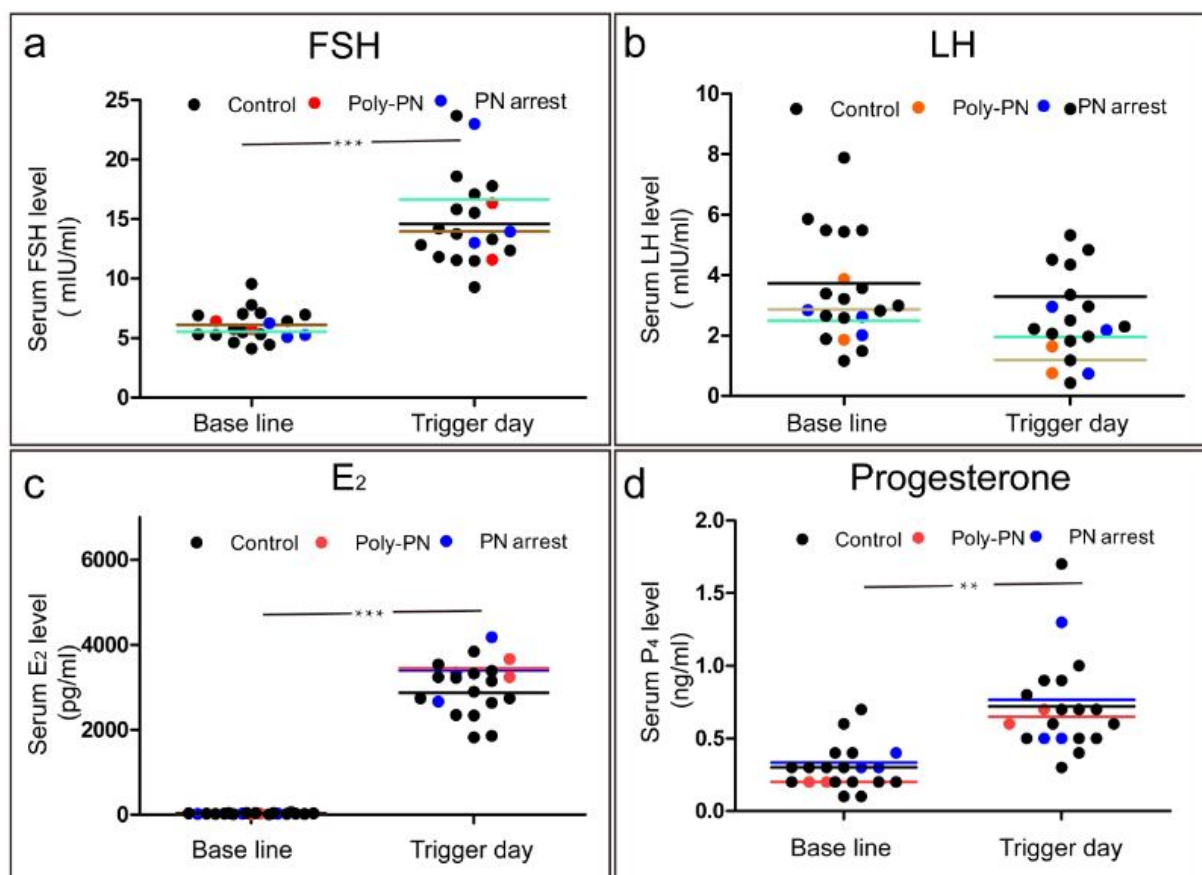

7  
8 **Supplementary figure 1.** Serum hormone levels separately at base line and trigger day  
9 during ovarian stimulation cycles. (a-d) Serum hormone levels were significantly changed  
10 in same group at two time point but without significant difference between groups in FSH  
11 ( $F_{\text{times}(1,17)} = 55.81, P < 0.0001; F_{\text{groups}(2,17)} = 0.18, P = 0.83$ )(a), E<sub>2</sub> ( $F_{\text{times}(1,17)} =$   
12  $286.36, P < 0.0001; F_{\text{groups}(2,17)} = 1.49, P = 0.25$ )(c) and Progesterone ( $F_{\text{times}(1,17)} =$   
13  $9.80, P < 0.01; F_{\text{groups}(2,17)} = 0.43, P = 0.66$ )(d), as well as any difference was not shown  
14 in either time points and groups for LH ( $F_{\text{times}(1,17)} = 2.50, P = 0.13; F_{\text{groups}(2,17)} = 1.22,$   
15  $P = 0.32$ )(b).
